# Supplementary material
Source: PubMed Central journal article supplement (PMC3506012)

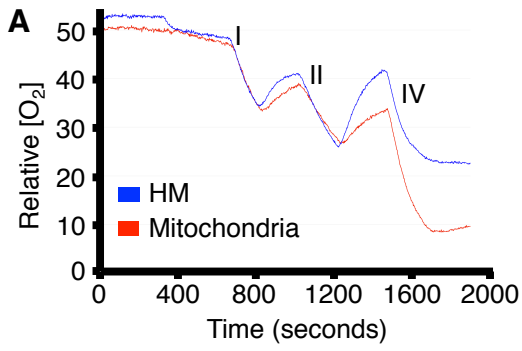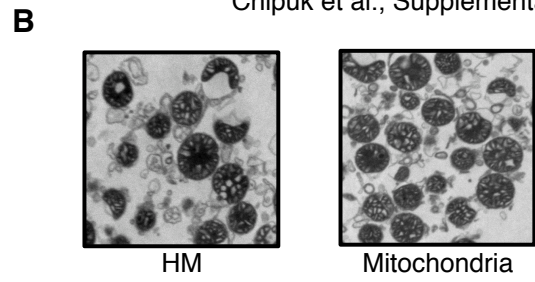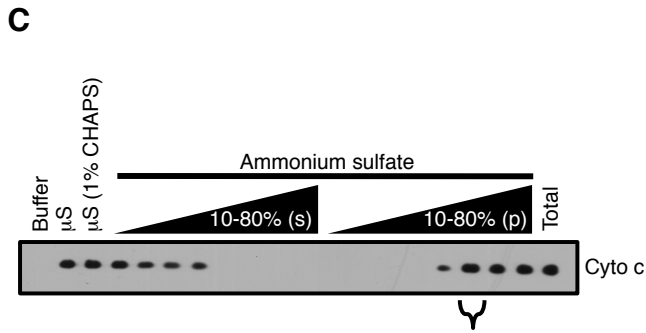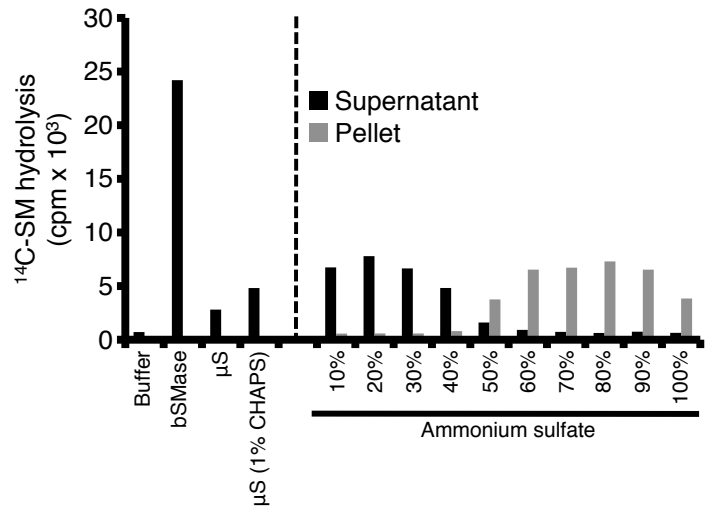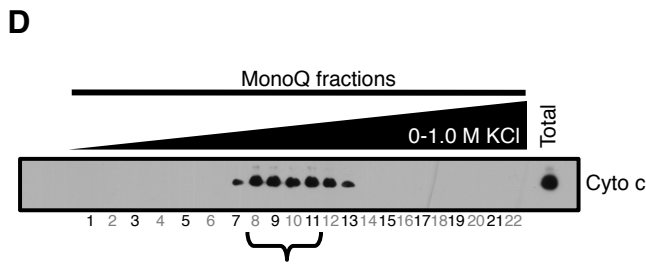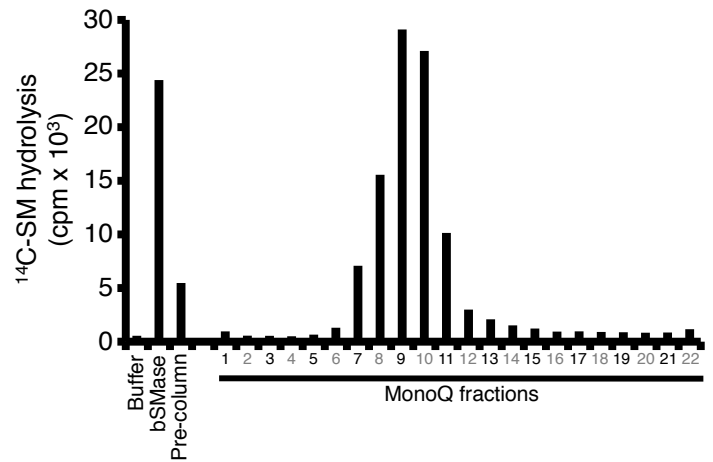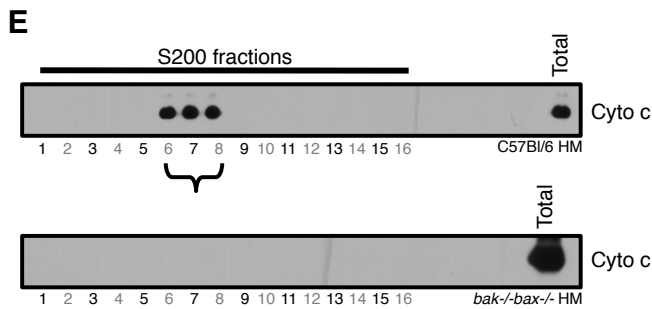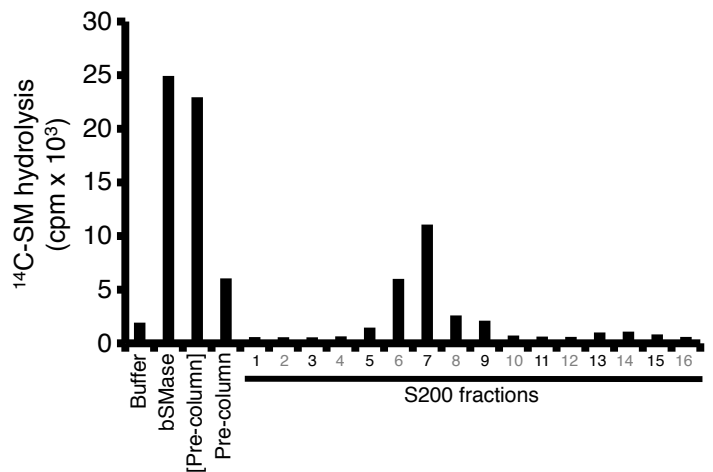

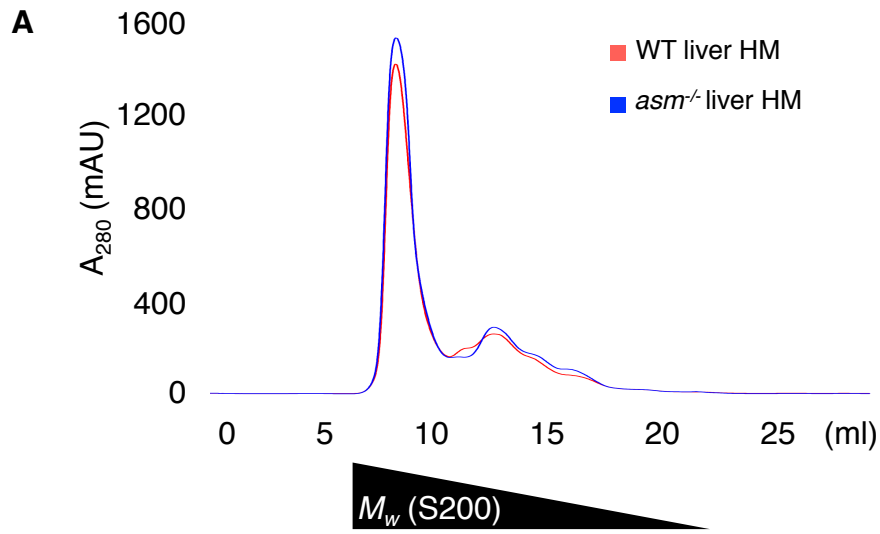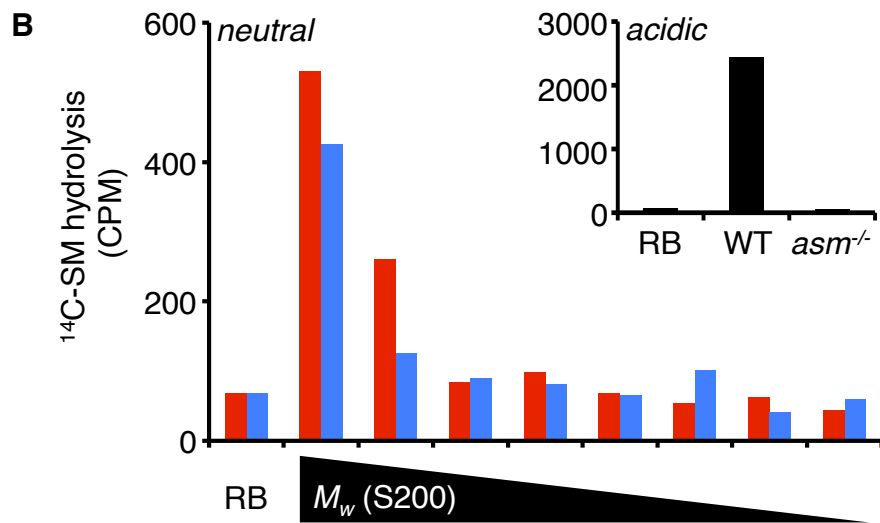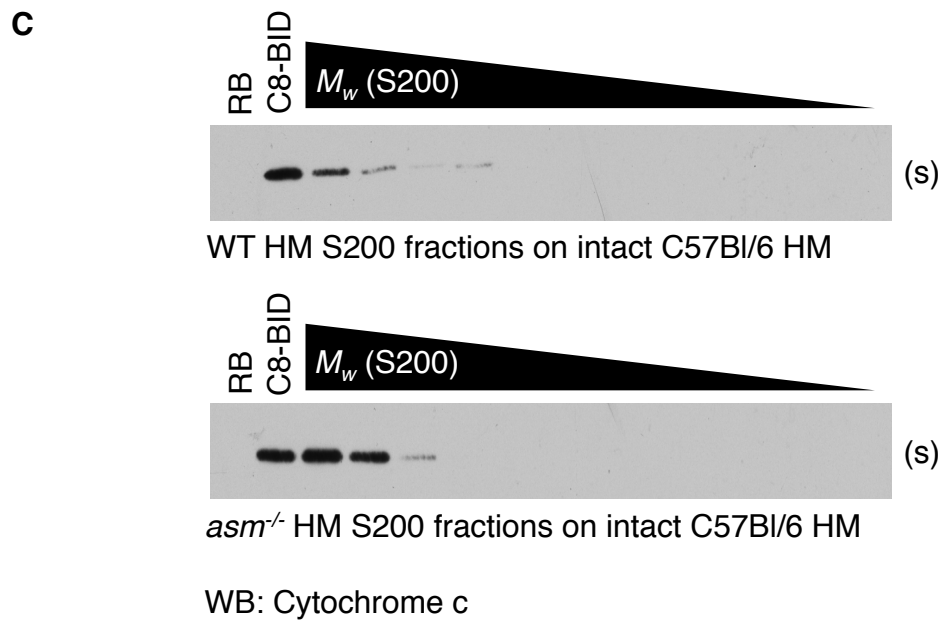

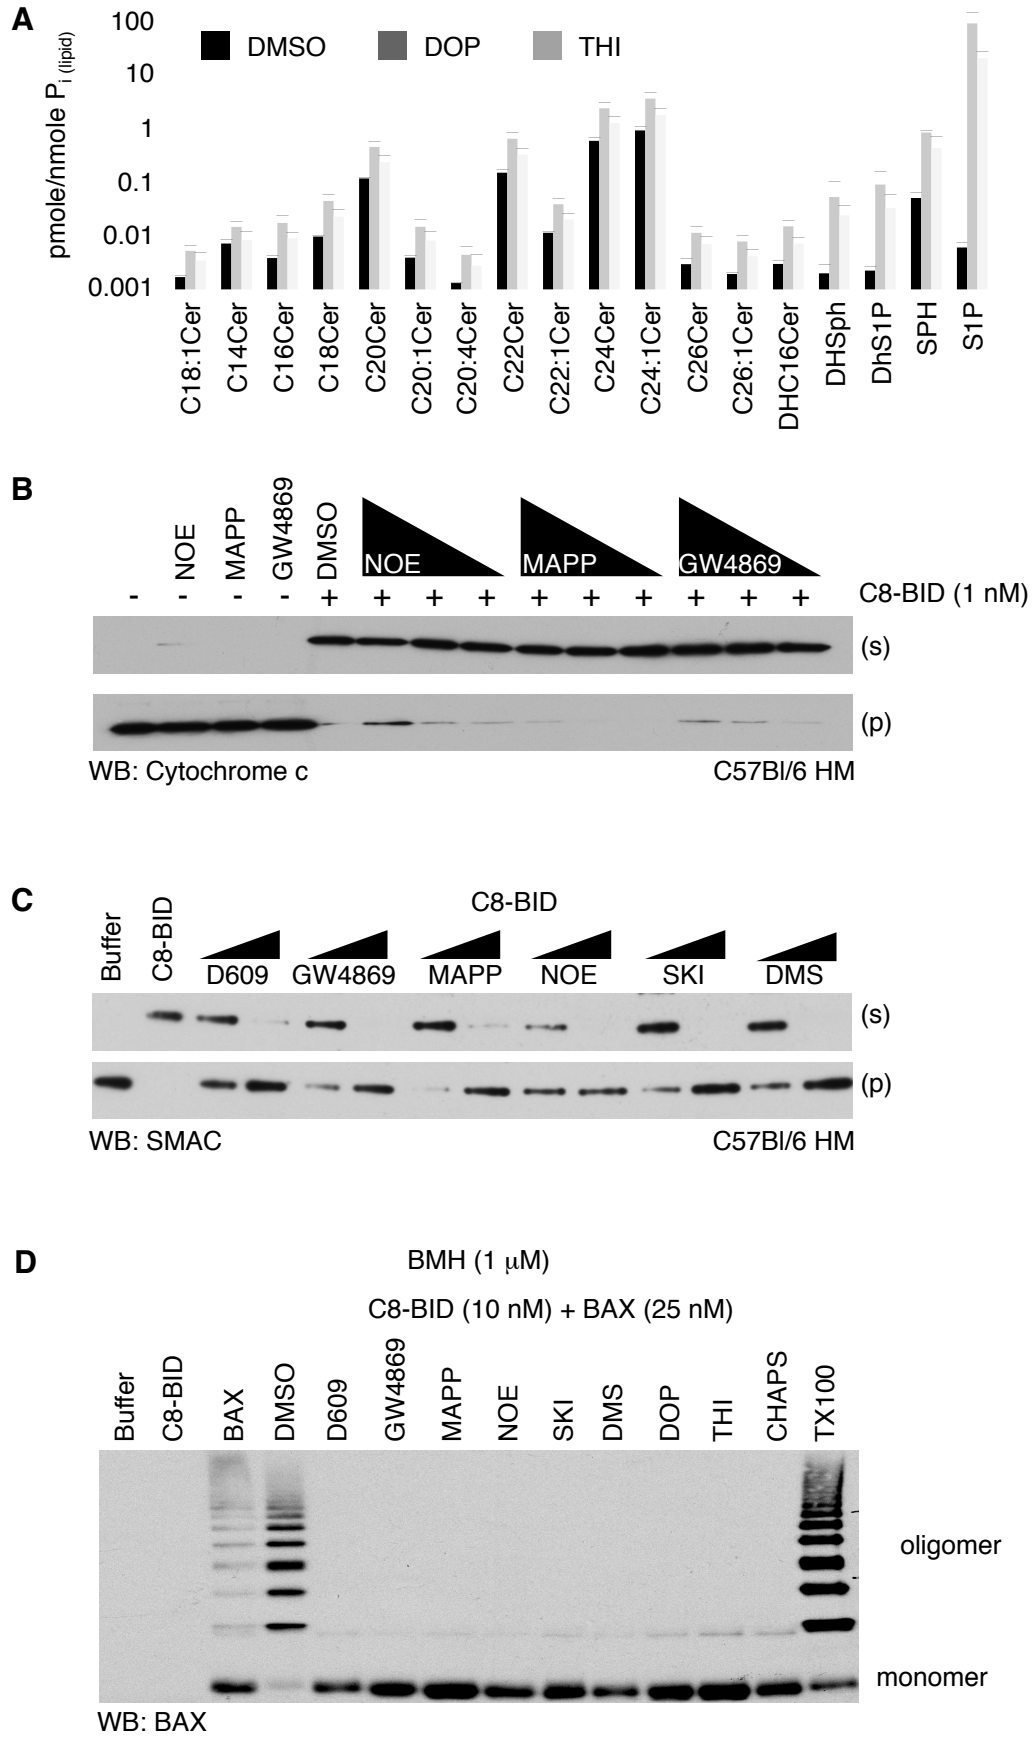

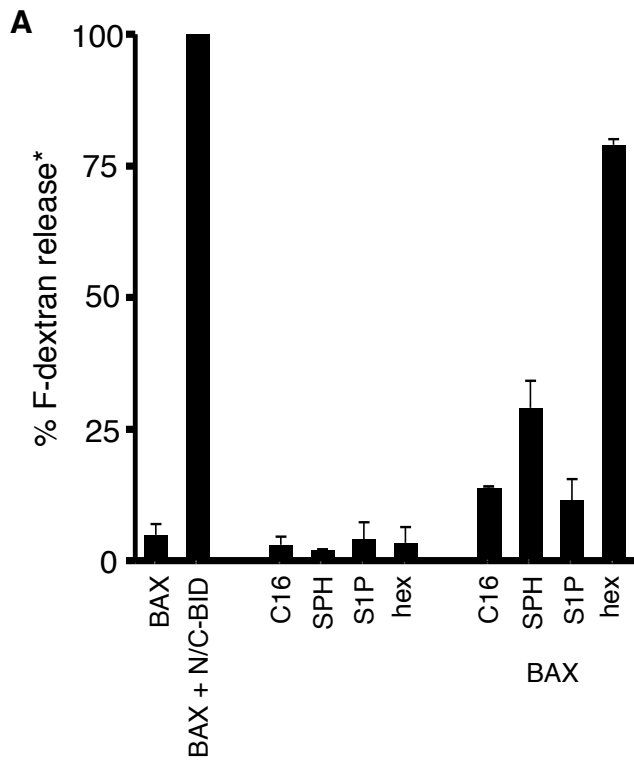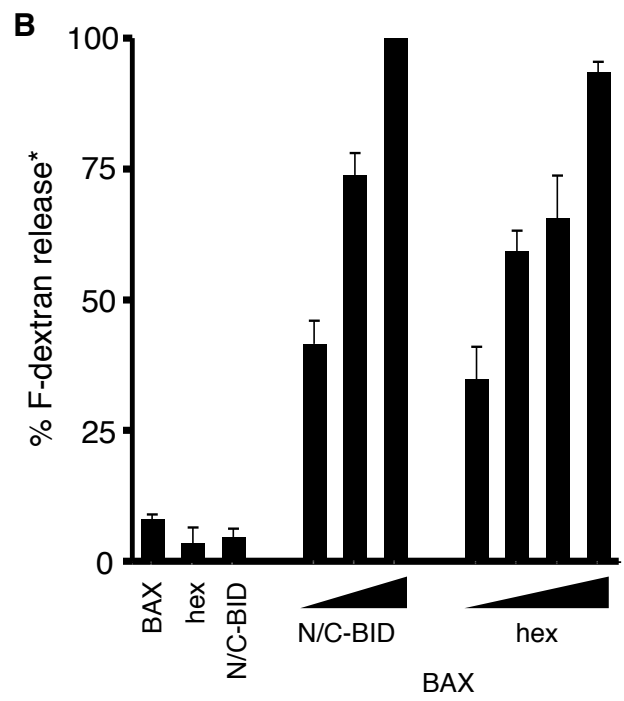

\*GST alone, BAX + N/C-BID = 0% and 100%, respectively  
Lipids/aldehyde added exogenously to 7% CL-LUV

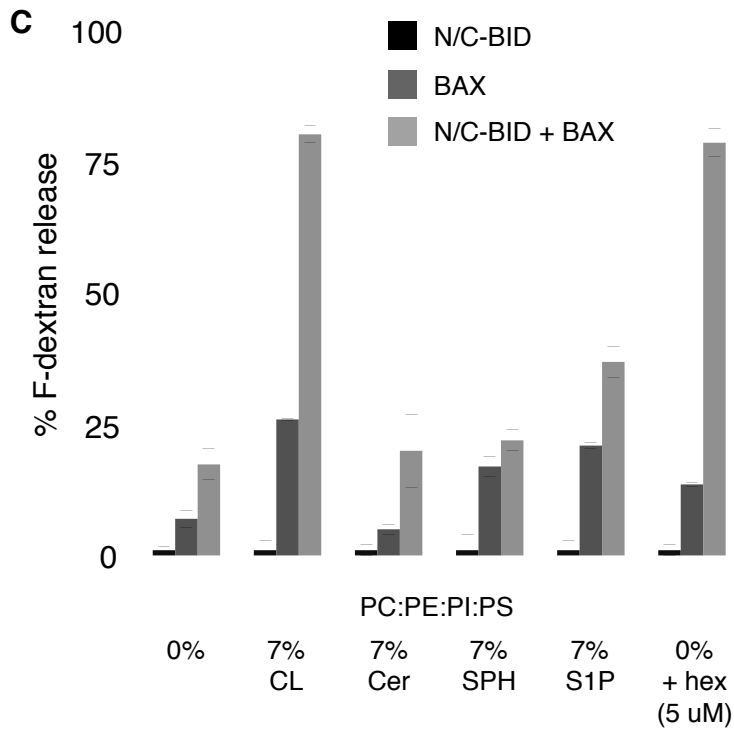

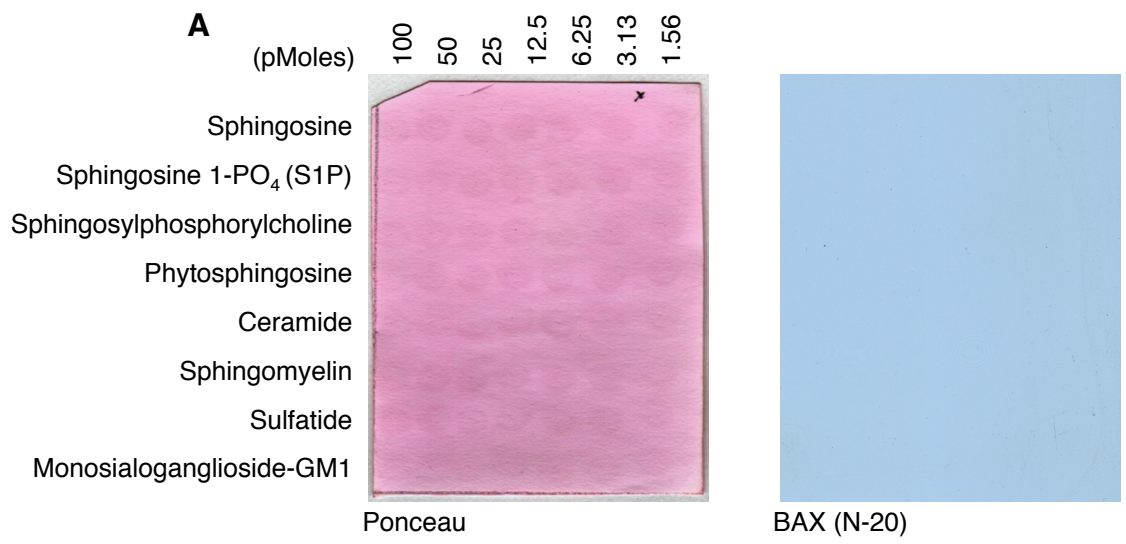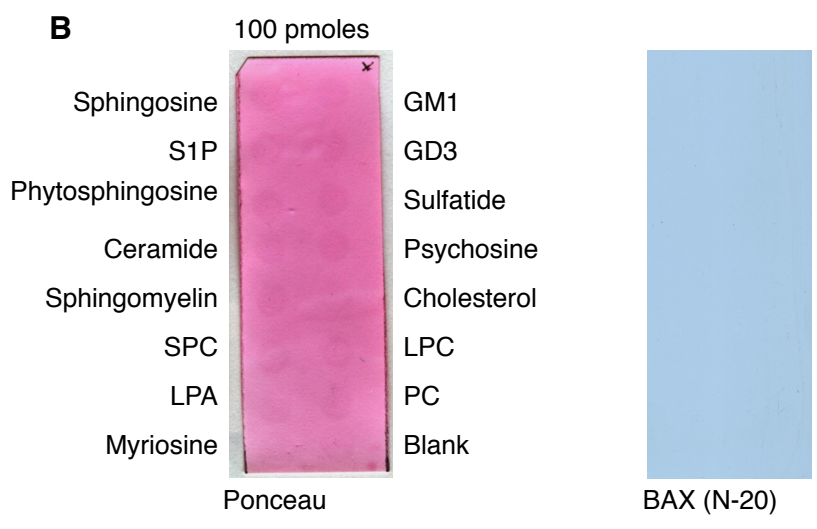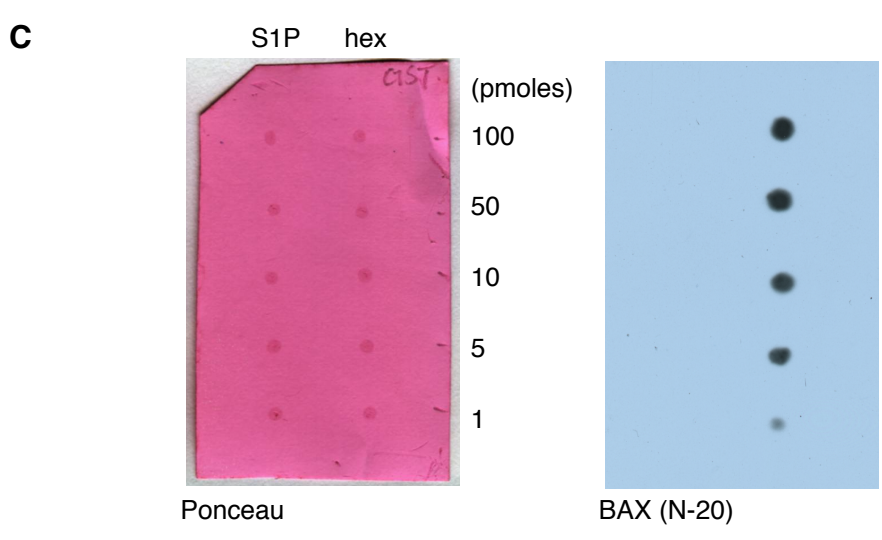

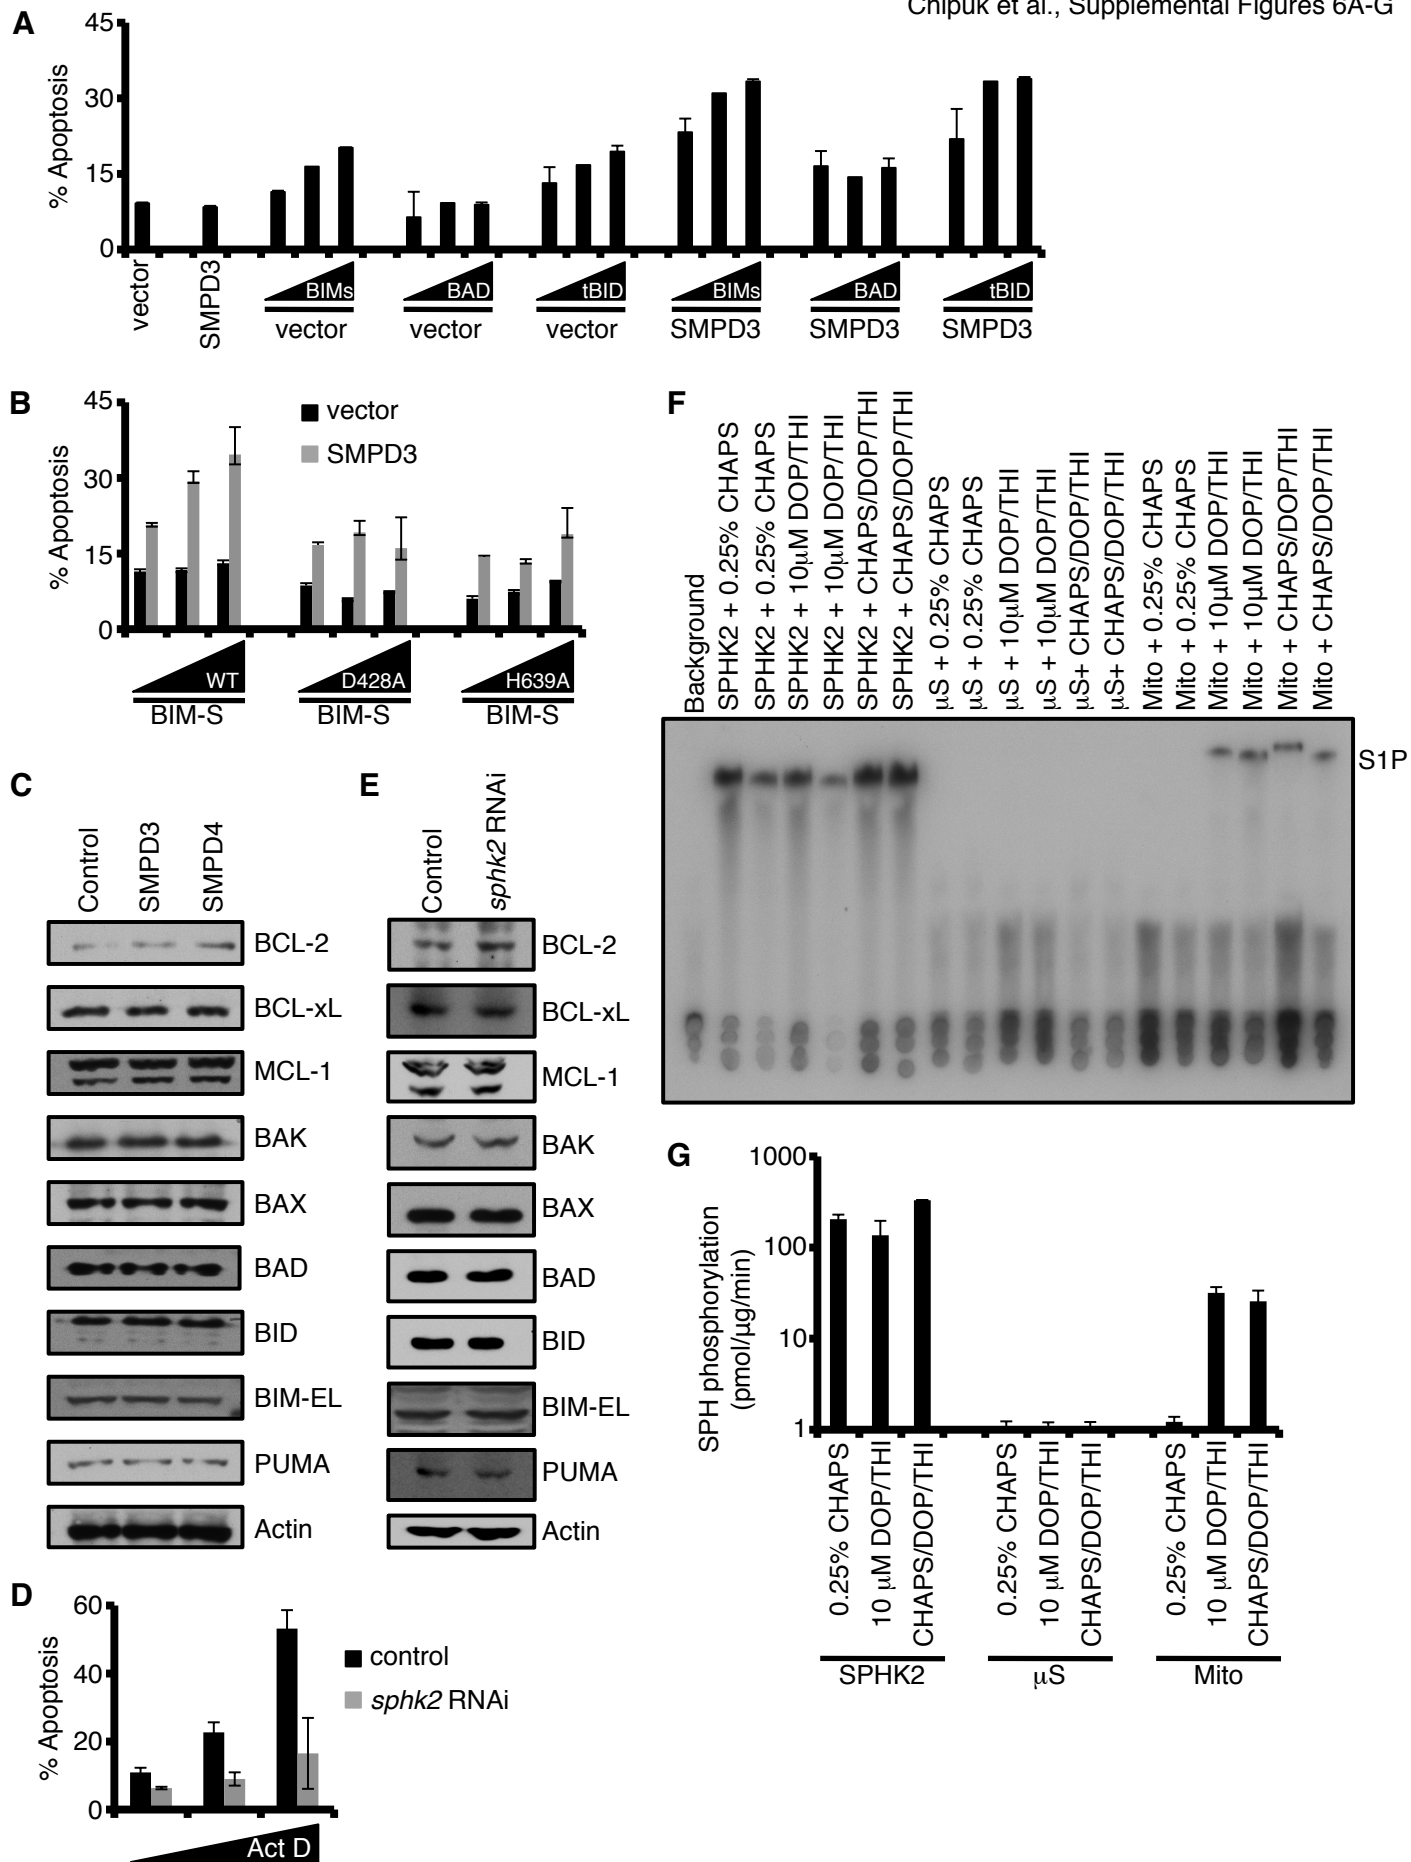

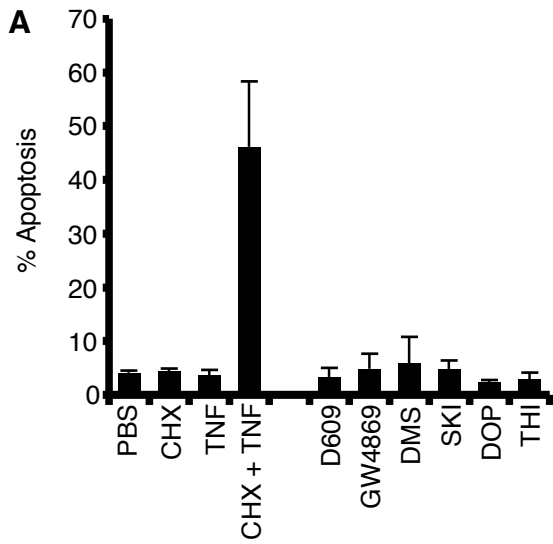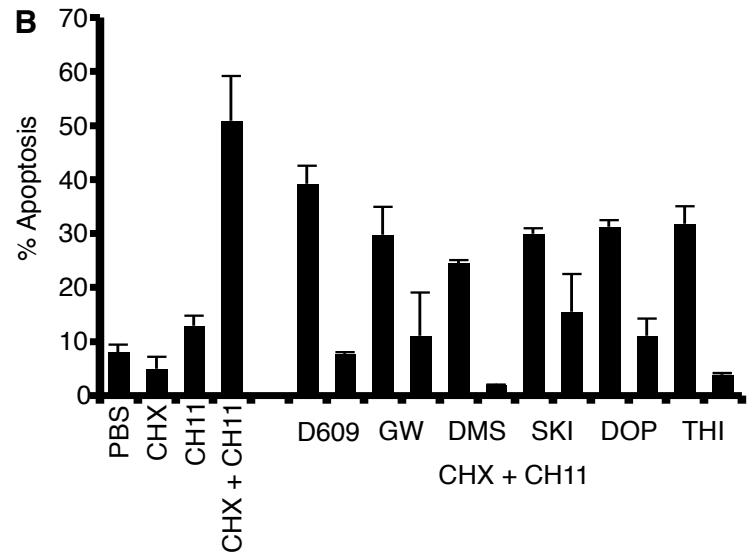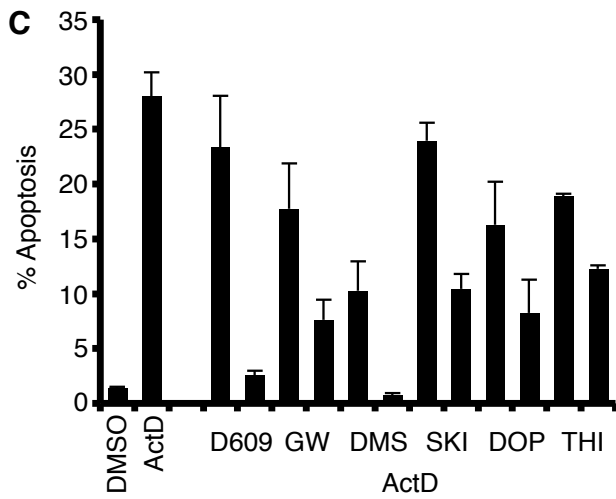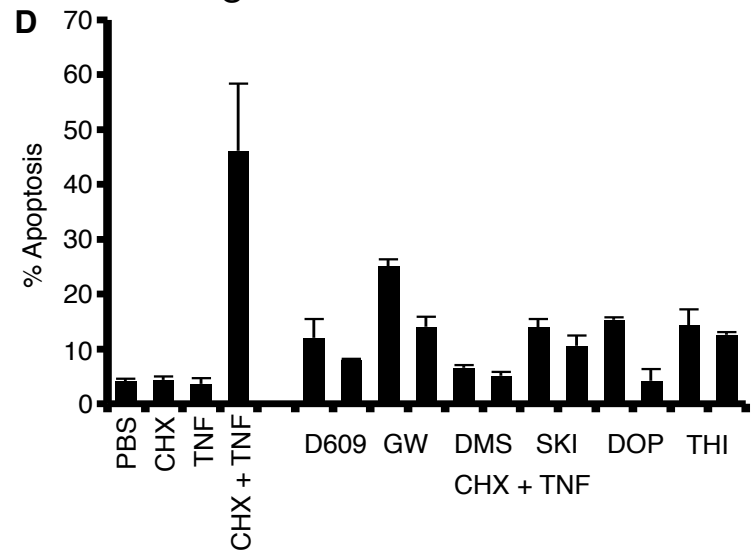

Supplement: NIHMS353367-supplement-01.pdf [file NIHMS353367-supplement-01.pdf]
